# Supplementary material
Source: HighWire-hosted journal article supplement (https://www.cmajopen.ca/highwire/filestream/89589/field_highwire_adjunct_files/2/open-2022-0157-3-at.pdf)
Supplement: open-2022-0157-3-at.pdf [file open-2022-0157-3-at.pdf]

**Table S3. Summary of Follow-up Time for Cases and Controls Before and After Index**

| <b>Group</b> | <b>Period</b> | <b>Mean</b> | <b>Median</b> | <b>Minimum</b> | <b>Maximum</b> |
|--------------|---------------|-------------|---------------|----------------|----------------|
| Control      | After Index   | 1,949       | 1,752         | 1              | 4,838          |
|              | Before Index  | 1,763       | 1,800         | 1              | 1,800          |
| Cancer       | After Index   | 1,596       | 1,233         | 1              | 4,838          |
|              | Before Index  | 1,770       | 1,800         | 1              | 1,800          |
